# Supplementary material for: Do Primary Health Professionals in Brazil Have a Misperception about Food? The Role of Food Literacy as a Positive Predictor
Source: MDPI journal article supplement (doi:10.3390/nu16020302), 2024-01-19
Supplement: s1 [file s1]

**Table** – Determined categories, meaning cores of interviews, number of occurrences and number of participants.

| Category                                                                      |                                        | Meaning core                                                | Occurrence<br>(number of<br>quotes) | Number of participants |       |
|-------------------------------------------------------------------------------|----------------------------------------|-------------------------------------------------------------|-------------------------------------|------------------------|-------|
|                                                                               |                                        |                                                             |                                     | Professionals          | Users |
| <b>1. Why corn chips are unhealthy?</b>                                       |                                        |                                                             |                                     |                        |       |
| Poor on nutrients                                                             | Processing degree                      | Excess of fat                                               | 4                                   | 4                      | 0     |
|                                                                               |                                        | Excess of salt                                              | 17                                  | 4                      | 13    |
|                                                                               |                                        | Excess of sugar                                             | 1                                   | 1                      | 0     |
|                                                                               |                                        | Low on micronutrients                                       | 4                                   | 3                      | 1     |
|                                                                               | Use of conservatives                   | 13                                                          | 6                                   | 7                      |       |
|                                                                               | Use of artificial food dyes            | 9                                                           | 4                                   | 5                      |       |
|                                                                               |                                        | Ultraprocessed or industrialized foods                      | 12                                  | 8                      | 4     |
| <b>2. Why fruit in syrup are unhealthy?</b>                                   |                                        |                                                             |                                     |                        |       |
| Poor on nutrients                                                             | Processing degree                      | Excess of salt                                              | 1                                   | 0                      | 1     |
|                                                                               |                                        | Excess of sugar                                             | 21                                  | 17                     | 4     |
|                                                                               |                                        | Use of conservatives                                        | 14                                  | 7                      | 7     |
|                                                                               |                                        | Ultraprocessed or industrialized foods                      | 5                                   | 2                      | 3     |
| <b>3. Why stuffed cookies are unhealthy?</b>                                  |                                        |                                                             |                                     |                        |       |
| Nutrients                                                                     | Processing degree                      | Excess of fat                                               | 15                                  | 8                      | 7     |
|                                                                               |                                        | Excess of salt                                              | 6                                   | 4                      | 2     |
|                                                                               |                                        | Excess of sugar                                             | 17                                  | 11                     | 6     |
|                                                                               |                                        | Low on nutrients                                            | 3                                   | 2                      | 1     |
|                                                                               | Use of conservatives                   | 6                                                           | 4                                   | 2                      |       |
|                                                                               | Use of artificial food dyes            | 8                                                           | 6                                   | 2                      |       |
|                                                                               | Ultraprocessed or industrialized foods | 7                                                           | 6                                   | 1                      |       |
|                                                                               | Due to the cookie filling              | 9                                                           | 5                                   | 4                      |       |
| <b>4. Do you believe that cream crackers are good or bad for your health?</b> |                                        |                                                             |                                     |                        |       |
| Usability                                                                     |                                        | Used in hospital diets                                      | 3                                   | 1                      | 2     |
|                                                                               |                                        | Health professionals (physicians and nutritionist) indicate | 3                                   | 1                      | 2     |
|                                                                               |                                        | Affordable source of carbohydrates                          | 1                                   | 1                      | 0     |
| Rich on nutrients                                                             |                                        | Good composition (it is only water and salt)                | 5                                   | 1                      | 4     |
|                                                                               |                                        | Excess of fat                                               | 1                                   | 1                      | 0     |
| Poor on nutrients                                                             |                                        | Excess of salt                                              | 4                                   | 4                      | 0     |
|                                                                               |                                        | Use of conservatives                                        | 4                                   | 4                      | 0     |
| Processing degree                                                             |                                        | Ultraprocessed or industrialized foods                      | 8                                   | 7                      | 1     |
|                                                                               |                                        | I do not know                                               | 4                                   | 2                      | 2     |
| Neutral                                                                       |                                        | It is not good nor bad                                      | 3                                   | 1                      | 2     |
|                                                                               |                                        | Better than stuffed cookie                                  | 11                                  | 9                      | 2     |
|                                                                               |                                        | It depends the consumed amount                              | 5                                   | 3                      | 2     |
| <b>5. Do you believe that ham is good or bad for your health?</b>             |                                        |                                                             |                                     |                        |       |
| Poor on nutrients                                                             |                                        | Excess of fat                                               | 3                                   | 1                      | 2     |
|                                                                               |                                        | Excess of salt                                              | 6                                   | 4                      | 2     |
|                                                                               |                                        | Use of conservatives                                        | 10                                  | 3                      | 7     |
| Processing degree                                                             |                                        | Ultraprocessed or industrialized foods                      | 14                                  | 12                     | 2     |

|                                                                                    |                                                                                           |    |    |   |
|------------------------------------------------------------------------------------|-------------------------------------------------------------------------------------------|----|----|---|
|                                                                                    | Processed meat                                                                            | 10 | 8  | 2 |
| Neutral                                                                            | I do not know                                                                             | 6  | 1  | 5 |
|                                                                                    | It depends the consumed amount                                                            | 3  | 3  | 0 |
| <b>6. Do you believe that soybean oil is good or bad for your health?</b>          |                                                                                           |    |    |   |
| Rich on nutrients                                                                  | Because it is of plant origin                                                             | 2  | 2  | 0 |
| Poor on nutrients                                                                  | Excess of fat                                                                             | 6  | 3  | 3 |
|                                                                                    | Worse than other oils                                                                     | 15 | 8  | 7 |
|                                                                                    | It is bad when used for frying                                                            | 5  | 5  | 0 |
|                                                                                    | Raises cholesterol levels                                                                 | 5  | 3  | 2 |
|                                                                                    | I couldn't explain why (but it is bad)                                                    | 5  | 1  | 4 |
| Neutral                                                                            | I do not know                                                                             | 5  | 5  | 0 |
|                                                                                    | It is cheap                                                                               | 5  | 4  | 1 |
|                                                                                    | It depends the consumed amount                                                            | 7  | 3  | 4 |
| <b>7. Do you believe that light foods are good or bad for your health?</b>         |                                                                                           |    |    |   |
| Rich on nutrients                                                                  | Contains less fat                                                                         | 4  | 1  | 3 |
|                                                                                    | Decrease in some nutrients                                                                | 3  | 2  | 1 |
| Usability                                                                          | Used in specific situations (diabetics, high cholesterol levels, special diets, athletes) | 5  | 3  | 2 |
|                                                                                    | They do "less harm" than common foods                                                     | 3  | 2  | 1 |
|                                                                                    | I couldn't explain why (but it is good)                                                   | 2  | 0  | 2 |
| Processing degree                                                                  | Ultraprocessed or industrialized foods                                                    | 4  | 3  | 1 |
| Neutral                                                                            | I do not know                                                                             | 6  | 4  | 2 |
|                                                                                    | I do not know what light food is                                                          | 3  | 2  | 1 |
|                                                                                    | It is not good nor bad                                                                    | 1  | 0  | 1 |
|                                                                                    | It depends the consumed amount                                                            | 4  | 3  | 1 |
| <b>8. Why do you believe that processed turkey breast is good for your health?</b> |                                                                                           |    |    |   |
| Rich on nutrients                                                                  | Less fat/calories                                                                         | 6  | 3  | 3 |
|                                                                                    | Less preservatives                                                                        | 1  | 0  | 1 |
|                                                                                    | It is cooked (not fried)                                                                  | 1  | 0  | 1 |
|                                                                                    | Source of fiber                                                                           | 1  | 0  | 1 |
| Poor on nutrients                                                                  | Excess of salt                                                                            | 4  | 3  | 1 |
|                                                                                    | It is a processed meat                                                                    | 8  | 7  | 1 |
|                                                                                    | Use of conservatives                                                                      | 5  | 4  | 1 |
| Processing degree                                                                  | Ultraprocessed or industrialized foods                                                    | 8  | 6  | 2 |
| Neutral                                                                            | I didn't know how to answer                                                               | 8  | 4  | 4 |
| Usability                                                                          | Best option within sausages and processed meat                                            | 9  | 6  | 3 |
| <b>9. Why do you believe that gelatin is good for your health?</b>                 |                                                                                           |    |    |   |
| Usability                                                                          | Suitable for diets/patients                                                               | 7  | 5  | 2 |
|                                                                                    | Suitable for pregnant women                                                               | 1  | 1  | 0 |
|                                                                                    | Suitable for the elderly                                                                  | 1  | 1  | 0 |
|                                                                                    | Recommended by doctors                                                                    | 3  | 1  | 2 |
|                                                                                    | Good for hydration                                                                        | 3  | 2  | 1 |
| Rich on nutrients                                                                  | Rich in calcium                                                                           | 2  | 1  | 1 |
|                                                                                    | Rich in collagen                                                                          | 17 | 11 | 6 |
|                                                                                    | It is a soft food                                                                         | 3  | 2  | 1 |
| Poor on nutrients                                                                  | Excess of sugar                                                                           | 6  | 6  | 0 |
| Processing degree                                                                  | Use of artificial food dyes                                                               | 7  | 6  | 1 |
|                                                                                    | Ultraprocessed or industrialized foods                                                    | 2  | 1  | 1 |
| Neutral                                                                            | I do not know                                                                             | 2  | 0  | 2 |
|                                                                                    | It depends the consumed amount                                                            | 1  | 1  | 0 |

|                                                                         |                                    |    |   |   |
|-------------------------------------------------------------------------|------------------------------------|----|---|---|
| <b>10. Why do you believe that coconut oil is good for your health?</b> |                                    |    |   |   |
| Rich on nutrients                                                       | Less preservatives                 | 2  | 2 | 0 |
|                                                                         | Natural (fruit source)             | 15 | 7 | 8 |
| Usability                                                               | Less fat                           | 2  | 2 | 0 |
|                                                                         | I don't know why (but is good)     | 2  | 0 | 2 |
|                                                                         | Better than Other oils             | 11 | 9 | 2 |
|                                                                         | Reccomended in the media           | 3  | 1 | 2 |
| Poor on nutrients                                                       | Raises LDL and triglyceride levels | 2  | 2 | 0 |
| Neutral                                                                 | I do not know                      | 5  | 3 | 2 |
|                                                                         | It depends the consumed amount     | 3  | 3 | 0 |
| <b>11. Why do you believe that honey is good for your health?</b>       |                                    |    |   |   |
| Usability                                                               | Good for flu                       | 4  | 1 | 3 |
|                                                                         | Has anti-inflammatory action       | 5  | 5 | 0 |
|                                                                         | Natural food                       | 17 | 9 | 8 |
| Rich on nutrients                                                       | Has antioxidants                   | 1  | 1 | 0 |
|                                                                         | I don't know why (but is good)     | 1  | 1 | 0 |
|                                                                         | Better than sugar                  | 5  | 5 | 0 |
| Poor on nutrients                                                       | Excess of sugar                    | 5  | 4 | 1 |
| Neutral                                                                 | I do not know                      | 2  | 0 | 2 |
|                                                                         | It depends the consumed amount     | 4  | 4 | 0 |
|                                                                         | It depends from the source         | 10 | 6 | 4 |
